# Supplementary figures and images for: MinION Sequencing of Fungi in Sub-Saharan African Air and a Novel LAMP Assay for Rapid Detection of the Tropical Phytopathogenic Genus Lasiodiplodia
Source: MDPI journal article supplement (doi:10.3390/pathogens13040330), 2024-04-17

OTU number

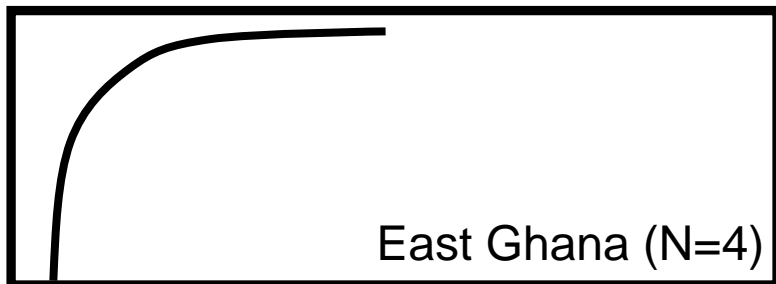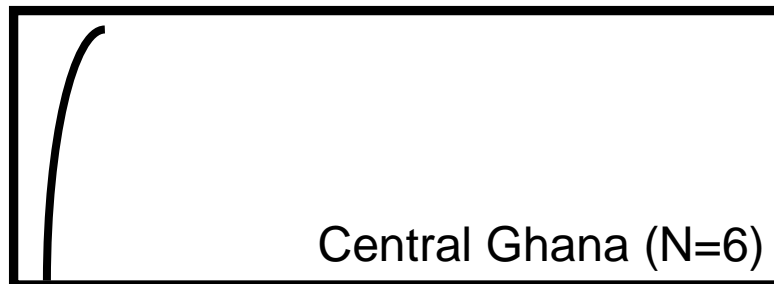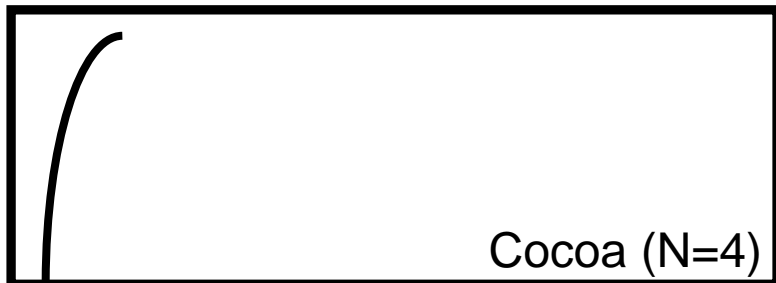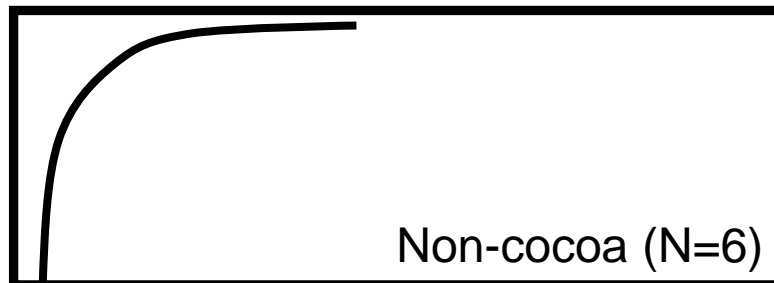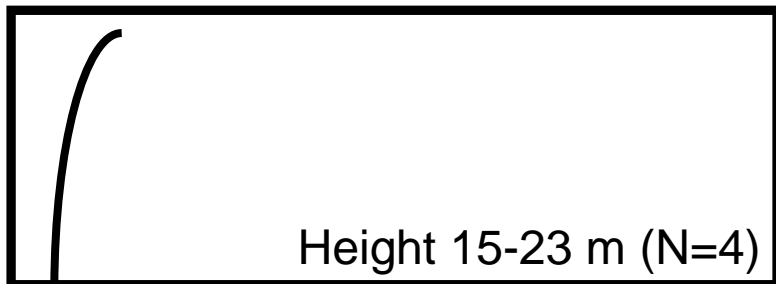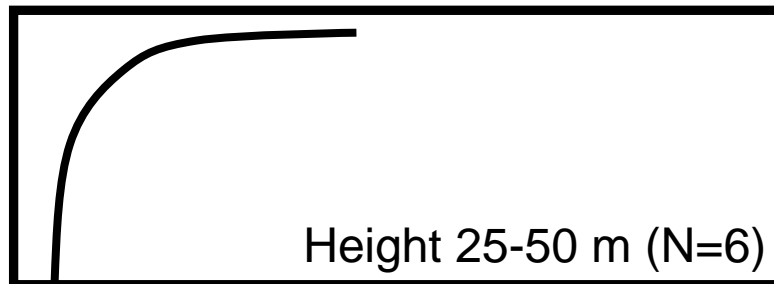

Read number

Supplement: s1 [file s1]
